# Supplementary material for: Finite mixtures of multivariate scale-shape mixtures of skew-normal distributions
Source: Springer Nature journal article supplement (doi:10.1007/s00362-018-01061-z), 2018-12-13
Supplement: MOESM1 [file 362_2018_1061_MOESM1_ESM.pdf]

## **Supplementary Material for “Finite Mixtures of Multivariate Scale-Shape Mixtures of Skew-normal Distributions”**

**Wan-Lun Wang · Ahad Jamalizadeh · Tsung-I Lin**

Received: date / Accepted: date

This supporting information contains additional results for the simulation studies.

### **S1. Additional Figures for Simulation 1**

---

W. L. Wang

Department of Statistics, Graduate Institute of Statistics and Actuarial Science, Feng Chia University,  
Taichung 40724, Taiwan

A. Jamalizadeh

Department of Statistics, Faculty of Mathematics & Computer, Shahid Bahonar University of Kerman, Ker-  
man, Iran

Mahani Mathematical Research Center, Shahid Bahonar University of Kerman, Kerman, Iran

T. I. Lin (✉)

Institute of Statistics, National Chung Hsing University, Taichung 402, Taiwan  
Department of Public Health, China Medical University, Taichung 404, Taiwan

Tel.: +886-4-22850420

Fax: +886-4-22873028

E-mail: tilin@nchu.edu.tw

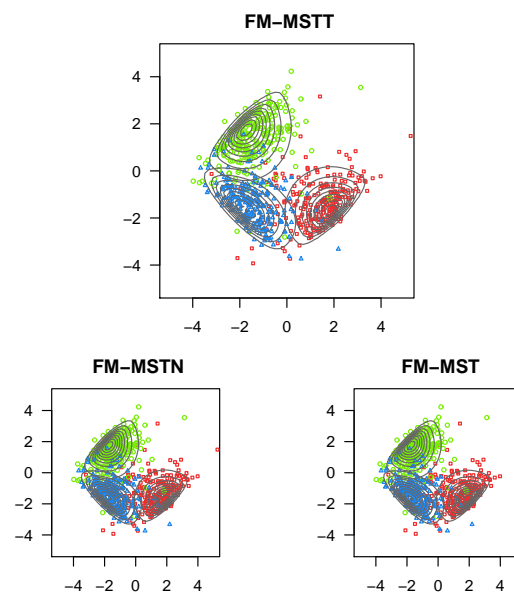

**Fig. S.1** A simulated sample ( $n = 1500$ ) from the FM-MSTN model and the respective density contours.

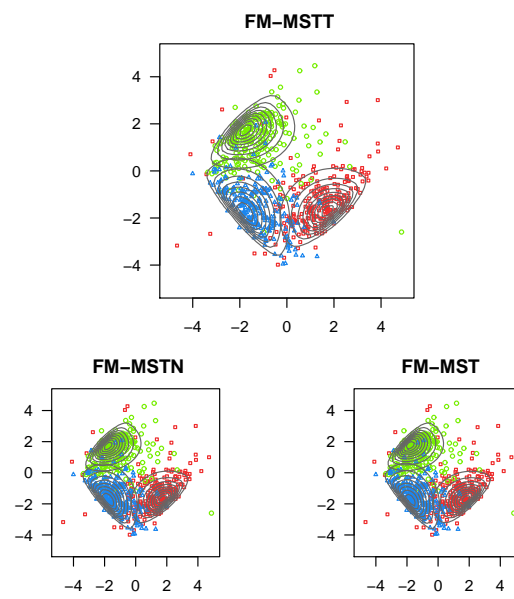

**Fig. S.2** A simulated sample ( $n = 1500$ ) from the FM-MST model and the respective density contours.

## S2. Additional Results for Simulation 2

A similar experiment as in Section 4.2 is undertaken for two-component FM-MSGLN and FM-MSSN models to examine the finite samples properties of the ML estimators based on the proposed ECM algorithm. For drawing MC samples from the two models, the simulation settings are as follows:

(i) For the FM-MSGLN model, the presumed parameters are

$$\pi = 0.5, \boldsymbol{\xi}_1 = (-3, 0)^\top, \boldsymbol{\xi}_2 = (-5, 2)^\top, \boldsymbol{\Sigma}_1 = \boldsymbol{\Sigma}_2 = \mathbf{I}_2, \\ \boldsymbol{\lambda}_1 = (3, -4)^\top, \boldsymbol{\lambda}_2 = (2, 3)^\top, \alpha_1 = 8, \alpha_2 = 6.$$

(ii) For the FM-MSSN model, the presumed parameters are

$$\pi = 0.5, \boldsymbol{\xi}_1 = (3, 1)^\top, \boldsymbol{\xi}_2 = (-1, 2)^\top, \boldsymbol{\Sigma}_1 = \boldsymbol{\Sigma}_2 = \mathbf{I}_2, \\ \boldsymbol{\lambda}_1 = (-3, 2)^\top, \boldsymbol{\lambda}_2 = (3, -2)^\top, q_1 = 5, q_2 = 3.$$

Figure S.3 displays the scatter-contour plots of one simulation case ( $n = 1000$ ) for samples randomly drawn from the FM-MSGLN and FM-MSSN models.

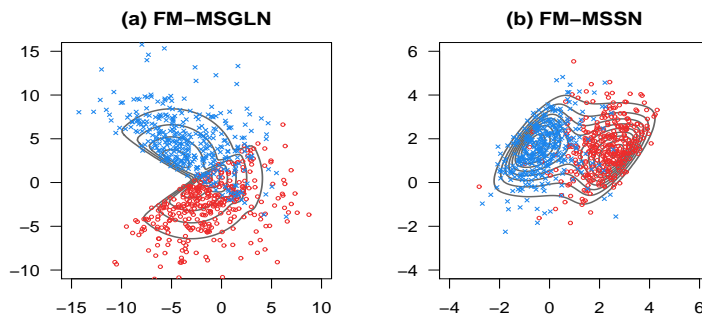

**Fig. S.3** Scatter-contour plots of one simulation case ( $n = 1000$ ) for samples randomly drawn from the FM-MSGLN and FM-MSSN models.

Analogous to the FM-MSTT case already presented in Section 4.2, numerical results summarized in Tables S.1 and S.2 indicate that the proposed algorithm can provide reliable and accurate parameter estimates under the scenario of FM-MSGLN and FM-MSSN models when  $n$  is sufficiently large.

**Table S.1** Simulation results of the FM-MSGLN model for assessing the consistency of parameter estimates and standard errors with various sample sizes. The notation  $f_{ir}$  denotes the elements contained in  $\text{vech}(\boldsymbol{\Sigma}_i^{1/2})$  for  $i = 1, 2$  and  $r = 1, 2, 3$ .

| Sample Size ( $n$ ) | Component ( $i$ ) | Measure | Parameter |            |            |          |          |          |                |                |            |
|---------------------|-------------------|---------|-----------|------------|------------|----------|----------|----------|----------------|----------------|------------|
|                     |                   |         | $\pi$     | $\xi_{i1}$ | $\xi_{i2}$ | $f_{i1}$ | $f_{i2}$ | $f_{i3}$ | $\lambda_{i1}$ | $\lambda_{i2}$ | $\alpha_i$ |
| 500                 | 1                 | AB      | 0.022     | 0.335      | 0.309      | 0.482    | 0.067    | 0.469    | 0.981          | 1.331          | 6.099      |
|                     |                   | MSE     | 50.001    | 0.178      | 0.335      | 0.387    | 0.010    | 0.363    | 1.379          | 2.578          | 82.931     |
|                     |                   | Emp Std | 0.030     | 0.422      | 0.571      | 0.605    | 0.098    | 0.589    | 0.963          | 1.289          | 8.533      |
|                     | IM Std            | 0.033   | 0.424     | 0.342      | 0.378      | 0.041    | 0.372    | 1.969    | 2.594          | 19.910         |            |
|                     | 2                 | AB      | –         | 0.349      | 0.288      | 0.473    | 0.087    | 0.430    | 0.726          | 1.032          | 5.235      |
|                     |                   | MSE     | –         | 0.196      | 0.341      | 0.440    | 0.038    | 0.309    | 0.829          | 1.753          | 71.460     |
| Emp Std             |                   | –       | 0.443     | 0.584      | 0.649      | 0.192    | 0.550    | 0.911    | 1.325          | 7.702          |            |
| 1000                | 1                 | IM Std  | –         | 0.419      | 0.294      | 0.358    | 0.049    | 0.329    | 1.415          | 2.090          | 18.617     |
|                     |                   | AB      | 0.014     | 0.232      | 0.182      | 0.421    | 0.050    | 0.413    | 0.807          | 1.084          | 3.842      |
|                     |                   | MSE     | 3e–4      | 0.087      | 0.054      | 0.287    | 0.004    | 0.263    | 0.918          | 1.806          | 30.817     |
|                     | Emp Std           | 0.018   | 0.295     | 0.227      | 0.528      | 0.066    | 0.508    | 0.715    | 0.920          | 5.360          |            |
|                     | IM Std            | 0.023   | 0.295     | 0.234      | 0.309      | 0.031    | 0.304    | 1.220    | 1.615          | 8.033          |            |
|                     | 2                 | AB      | –         | 0.227      | 0.165      | 0.404    | 0.503    | 0.369    | 0.522          | 0.741          | 2.859      |
| MSE                 |                   | –       | 0.086     | 0.045      | 0.279      | 0.005    | 0.211    | 0.418    | 0.833          | 18.654         |            |
| Emp Std             |                   | –       | 0.293     | 0.212      | 0.528      | 0.072    | 0.459    | 0.646    | 0.913          | 4.076          |            |
| 2000                | 1                 | IM Std  | –         | 0.291      | 0.205      | 0.288    | 0.037    | 0.271    | 0.813          | 1.194          | 5.626      |
|                     |                   | AB      | 0.011     | 0.163      | 0.129      | 0.344    | 0.035    | 0.320    | 0.685          | 0.944          | 2.693      |
|                     |                   | MSE     | 2e–4      | 0.043      | 0.027      | 0.179    | 0.002    | 0.148    | 0.649          | 1.217          | 12.990     |
|                     | Emp Std           | 0.012   | 0.207     | 0.158      | 0.413      | 0.047    | 0.382    | 0.506    | 0.671          | 3.565          |            |
|                     | IM Std            | 0.016   | 0.207     | 0.164      | 0.211      | 0.021    | 0.206    | 0.805    | 1.068          | 3.321          |            |
|                     | 2                 | AB      | –         | 0.174      | 0.121      | 0.258    | 0.040    | 0.239    | 0.339          | 0.487          | 1.767      |
| MSE                 |                   | –       | 0.046     | 0.023      | 0.113      | 0.003    | 0.088    | 0.178    | 0.364          | 7.175          |            |
| Emp Std             |                   | –       | 0.214     | 0.151      | 0.336      | 0.050    | 0.292    | 0.421    | 0.602          | 3.617          |            |
| 4000                | 1                 | IM Std  | –         | 0.205      | 0.145      | 0.198    | 0.025    | 0.185    | 0.514          | 0.745          | 3.516      |
|                     |                   | AB      | 0.006     | 0.134      | 0.093      | 0.209    | 0.027    | 0.205    | 0.674          | 0.905          | 1.595      |
|                     |                   | MSE     | 1e–4      | 0.026      | 0.013      | 0.068    | 0.001    | 0.069    | 0.553          | 0.995          | 4.185      |
|                     | Emp Std           | 0.007   | 0.160     | 0.115      | 0.254      | 0.033    | 0.258    | 0.347    | 0.439          | 2.056          |            |
|                     | IM Std            | 0.011   | 0.145     | 0.115      | 0.140      | 0.015    | 0.139    | 0.525    | 0.704          | 2.275          |            |
|                     | 2                 | AB      | –         | 0.115      | 0.077      | 0.172    | 0.031    | 0.166    | 0.218          | 0.287          | 1.004      |
| MSE                 |                   | –       | 0.019     | 0.009      | 0.047      | 0.001    | 0.044    | 0.071    | 0.133          | 1.690          |            |
| Emp Std             |                   | –       | 0.139     | 0.093      | 0.218      | 0.038    | 0.210    | 0.263    | 0.360          | 1.289          |            |
| IM Std              | –                 | 0.145   | 0.102     | 0.134      | 0.018      | 0.124    | 0.342    | 0.496    | 1.606          |                |            |

**Table S.2** Simulation results of FM-MSSN model for assessing the consistency of parameter estimates and standard errors with various sample sizes. The notation  $f_{ir}$  denotes the elements contained in  $\text{vech}(\boldsymbol{\Sigma}_i^{1/2})$  for  $i = 1, 2$  and  $r = 1, 2, 3$ .

| Sample Size ( $n$ ) | Component ( $i$ ) | Measure | Parameter |            |            |          |          |          |                |                |         |
|---------------------|-------------------|---------|-----------|------------|------------|----------|----------|----------|----------------|----------------|---------|
|                     |                   |         | $\pi$     | $\xi_{i1}$ | $\xi_{i2}$ | $f_{i1}$ | $f_{i2}$ | $f_{i3}$ | $\lambda_{i1}$ | $\lambda_{i2}$ | $q_i$   |
| 500                 | 1                 | AB      | 0.054     | 0.190      | 0.347      | 0.468    | 0.313    | 0.322    | 1.629          | 1.403          | 8.829   |
|                     |                   | MSE     | 0.004     | 0.073      | 0.229      | 0.414    | 0.194    | 0.182    | 4.178          | 3.173          | 294.251 |
|                     |                   | Emp Std | 0.065     | 0.263      | 0.436      | 0.639    | 0.364    | 0.420    | 2.039          | 1.748          | 15.554  |
|                     |                   | IM Std  | 0.047     | 0.102      | 0.120      | 0.100    | 0.048    | 0.074    | 1.070          | 0.775          | 51.703  |
|                     | 2                 | AB      | –         | 0.153      | 0.225      | 0.717    | 0.272    | 0.246    | 1.409          | 0.899          | 5.492   |
|                     |                   | MSE     | –         | 0.041      | 0.103      | 1.159    | 0.175    | 0.110    | 3.317          | 1.446          | 211.077 |
|                     |                   | Emp Std | –         | 0.203      | 0.306      | 0.951    | 0.373    | 0.314    | 1.715          | 1.202          | 13.570  |
|                     |                   | IM Std  | –         | 0.090      | 0.102      | 0.110    | 0.047    | 0.060    | 1.184          | 0.736          | 27.890  |
| 1000                | 1                 | AB      | 0.034     | 0.108      | 0.183      | 0.313    | 0.179    | 0.214    | 1.012          | 0.772          | 4.312   |
|                     |                   | MSE     | 0.002     | 0.025      | 0.083      | 0.175    | 0.084    | 0.104    | 1.808          | 1.128          | 101.436 |
|                     |                   | Emp Std | 0.043     | 0.156      | 0.273      | 0.420    | 0.262    | 0.324    | 1.346          | 1.052          | 9.559   |
|                     |                   | IM Std  | 0.030     | 0.066      | 0.077      | 0.073    | 0.031    | 0.048    | 0.694          | 0.496          | 14.012  |
|                     | 2                 | AB      | –         | 0.093      | 0.134      | 0.390    | 0.127    | 0.162    | 0.784          | 0.544          | 1.386   |
|                     |                   | MSE     | –         | 0.014      | 0.034      | 0.418    | 0.040    | 0.049    | 1.078          | 0.543          | 27.081  |
|                     |                   | Emp Std | –         | 0.119      | 0.176      | 0.602    | 0.189    | 0.217    | 1.012          | 0.733          | 5.084   |
|                     |                   | IM Std  | –         | 0.059      | 0.068      | 0.073    | 0.030    | 0.041    | 0.693          | 0.455          | 2.882   |
| 2000                | 1                 | AB      | 0.023     | 0.066      | 0.096      | 0.185    | 0.069    | 0.101    | 0.592          | 0.431          | 1.256   |
|                     |                   | MSE     | 0.001     | 0.008      | 0.021      | 0.058    | 0.008    | 0.017    | 0.642          | 0.354          | 5.457   |
|                     |                   | Emp Std | 0.029     | 0.090      | 0.144      | 0.242    | 0.090    | 0.128    | 0.796          | 0.595          | 2.230   |
|                     |                   | IM Std  | 0.019     | 0.043      | 0.051      | 0.052    | 0.021    | 0.033    | 0.481          | 0.347          | 1.581   |
|                     | 2                 | AB      | –         | 0.054      | 0.075      | 0.173    | 0.061    | 0.086    | 0.479          | 0.337          | 0.522   |
|                     |                   | MSE     | –         | 0.005      | 0.010      | 0.075    | 0.009    | 0.013    | 0.409          | 0.191          | 7.572   |
|                     |                   | Emp Std | –         | 0.070      | 0.099      | 0.272    | 0.093    | 0.113    | 0.628          | 0.437          | 2.736   |
|                     |                   | IM Std  | –         | 0.040      | 0.046      | 0.047    | 0.019    | 0.027    | 0.456          | 0.318          | 0.781   |
| 4000                | 1                 | AB      | 0.017     | 0.046      | 0.055      | 0.131    | 0.047    | 0.082    | 0.388          | 0.250          | 0.067   |
|                     |                   | MSE     | 4e-4      | 0.003      | 0.005      | 0.027    | 0.004    | 0.011    | 0.231          | 0.099          | 1.175   |
|                     |                   | Emp Std | 0.021     | 0.058      | 0.073      | 0.163    | 0.061    | 0.106    | 0.478          | 0.314          | 1.036   |
|                     |                   | IM Std  | 0.013     | 0.030      | 0.035      | 0.037    | 0.015    | 0.023    | 0.332          | 0.242          | 0.755   |
|                     | 2                 | AB      | –         | 0.033      | 0.045      | 0.112    | 0.043    | 0.067    | 0.260          | 0.202          | 0.161   |
|                     |                   | MSE     | –         | 0.002      | 0.004      | 0.020    | 0.003    | 0.006    | 0.111          | 0.066          | 0.042   |
|                     |                   | Emp Std | –         | 0.043      | 0.061      | 0.140    | 0.053    | 0.080    | 0.332          | 0.257          | 0.203   |
|                     |                   | IM Std  | –         | 0.028      | 0.032      | 0.033    | 0.013    | 0.019    | 0.311          | 0.220          | 0.218   |
